# Supplementary material for: Synthesis, structural characterization, and magnetic property study of {Cr3Ln3}, Ln = Gd and Dy complexes
Source: Royal Society of Chemistry journal article supplement (doi:10.1039/d1dt03176g), 2021-12-14
Supplement: d1dt03176g1.pdf [file d1dt03176g1.pdf]

## Supplementary Information

### Synthesis, structural characterization and magnetic properties study of Cr(III)/Ln(III), Ln=Gd and Dy complexes

**Juan H. Mecchia Ortiz<sup>[a]</sup>, Daiana Cabrosi<sup>[a]</sup>, Carlos Cruz<sup>[b],[c]</sup>, Verónica Paredes-García<sup>[b],[c]</sup> and Pablo Alborés<sup>[a]\*</sup>**

[a] Departamento de Química Inorgánica, Analítica y Química Física/ INQUIMAE (CONICET), Facultad de Ciencias Exactas y Naturales Universidad de Buenos Aires, Pabellón 2, Ciudad Universitaria, C1428EHA Buenos Aires, Argentina  
Fax: +5411 / 4576-3341  
E-mail: albores@qi.fcen.uba.ar

[b] Departamento de Ciencias Químicas, Facultad de Ciencias Exactas, Universidad Andres Bello, Avenida República 275, Santiago de Chile, Chile.

[c] Centro para el Desarrollo de la Nanociencia y Nanotecnología, CEDENNA, Santiago, Chile.

**Tables S1.** Main bond distances (Å) and angles (°) of complexes **1-3**.

| 1   |     |          | 2   |     |          | 3  |     |         |
|-----|-----|----------|-----|-----|----------|----|-----|---------|
| Gd1 | O5  | 2.346(8) | Dy1 | O27 | 2.38(1)  | Y1 | O5  | 2.29(2) |
| Gd1 | O4  | 2.425(9) | Dy1 | O21 | 2.370(9) | Y1 | O11 | 2.35(2) |
| Gd1 | O11 | 2.40(1)  | Dy1 | O20 | 2.359(7) | Y1 | O22 | 2.35(2) |
| Gd1 | O22 | 2.397(8) | Dy1 | O4  | 2.422(7) | Y1 | O10 | 2.34(3) |
| Gd1 | O10 | 2.35(1)  | Dy1 | O10 | 2.315(9) | Y1 | O4  | 2.34(2) |
| Gd1 | O3  | 2.434(8) | Dy1 | O1  | 2.390(8) | Y1 | O23 | 2.37(2) |
| Gd1 | O23 | 2.41(1)  | Dy1 | O5  | 2.322(7) | Y1 | O2  | 2.37(2) |
| Gd1 | O1  | 2.417(9) | Dy1 | O2  | 2.400(8) | Y1 | O5  | 2.29(2) |
| Gd2 | O6  | 2.354(9) | Dy2 | O2  | 2.377(7) | Y2 | O14 | 2.37(3) |
| Gd2 | O4  | 2.413(8) | Dy2 | O1  | 2.402(8) | Y2 | O24 | 2.39(3) |
| Gd2 | O14 | 2.43(1)  | Dy2 | O3  | 2.394(7) | Y2 | O15 | 2.37(3) |
| Gd2 | O1  | 2.42(1)  | Dy2 | O13 | 2.386(9) | Y2 | O2  | 2.38(2) |
| Gd2 | O2  | 2.416(8) | Dy2 | O7  | 2.323(8) | Y2 | O6  | 2.29(2) |
| Gd2 | O7  | 2.35(1)  | Dy2 | O6  | 2.333(8) | Y2 | O7  | 2.33(2) |
| Gd2 | O15 | 2.40(1)  | Dy2 | O12 | 2.406(8) | Y2 | O15 | 2.37(3) |
| Gd2 | O24 | 2.38(1)  | Dy2 | O23 | 2.35(1)  | Y2 | O3  | 2.37(2) |
| Gd3 | O1  | 2.457(8) | Dy3 | O1  | 2.418(7) | Y3 | O1  | 2.40(2) |
| Gd3 | O3  | 2.415(8) | Dy3 | O4  | 2.386(8) | Y3 | O4  | 2.38(2) |
| Gd3 | O19 | 2.420(8) | Dy3 | O9  | 2.35(1)  | Y3 | O9  | 2.35(3) |
| Gd3 | O9  | 2.37(1)  | Dy3 | O17 | 2.388(7) | Y3 | O19 | 2.38(2) |
| Gd3 | O26 | 2.40(1)  | Dy3 | O25 | 2.35(1)  | Y3 | O26 | 2.35(3) |
| Gd3 | O2  | 2.432(9) | Dy3 | O16 | 2.388(8) | Y3 | O18 | 2.36(2) |
| Gd3 | O8  | 2.345(8) | Dy3 | O3  | 2.405(8) | Y3 | O3  | 2.38(2) |
| Gd3 | O18 | 2.422(9) | Dy3 | O8  | 2.316(7) | Y3 | O8  | 2.30(2) |

|     |     |          |     |     |          |     |     |         |
|-----|-----|----------|-----|-----|----------|-----|-----|---------|
| Cr1 | O13 | 1.99(1)  | Cr1 | N1  | 2.09(1)  | Cr1 | N1  | 2.09(3) |
| Cr1 | O4  | 1.942(9) | Cr1 | O22 | 1.979(9) | Cr1 | O6  | 1.97(2) |
| Cr1 | O5  | 1.96(1)  | Cr1 | O5  | 1.956(8) | Cr1 | O5  | 1.97(3) |
| Cr1 | O12 | 2.01(1)  | Cr1 | O2  | 1.937(7) | Cr1 | O13 | 2.01(2) |
| Cr1 | O6  | 1.943(9) | Cr1 | O6  | 1.943(8) | Cr1 | O2  | 1.95(2) |
| Cr1 | N1  | 2.09(1)  | Cr1 | O11 | 1.976(8) | Cr1 | O12 | 1.98(2) |
| Cr2 | O2  | 1.951(9) | Cr2 | O7  | 1.958(7) | Cr2 | N2  | 2.11(3) |
| Cr2 | O7  | 1.952(8) | Cr2 | O3  | 1.949(8) | Cr2 | O16 | 1.98(3) |
| Cr2 | O8  | 1.95(1)  | Cr2 | O8  | 1.953(9) | Cr2 | O7  | 2.01(2) |
| Cr2 | O17 | 1.988(9) | Cr2 | O15 | 1.984(8) | Cr2 | O3  | 2.00(2) |
| Cr2 | O16 | 2.00(1)  | Cr2 | O14 | 1.98(1)  | Cr2 | O8  | 1.99(3) |
| Cr2 | N2  | 2.10(1)  | Cr2 | N2  | 2.08(1)  | Cr2 | O17 | 2.01(2) |
| Cr3 | O3  | 1.95(1)  | Cr3 | O10 | 1.974(7) | Cr3 | N3  | 2.04(4) |

|     |     |          |     |     |          |     |     |         |
|-----|-----|----------|-----|-----|----------|-----|-----|---------|
| Cr3 | O10 | 1.976(8) | Cr3 | O19 | 1.972(9) | Cr3 | O21 | 1.98(2) |
| Cr3 | O21 | 1.99(1)  | Cr3 | N3  | 2.10(2)  | Cr3 | O10 | 1.95(2) |
| Cr3 | N3  | 2.10(2)  | Cr3 | O18 | 1.979(7) | Cr3 | O4  | 1.99(3) |
| Cr3 | O20 | 1.969(8) | Cr3 | O9  | 1.964(8) | Cr3 | O9  | 1.95(2) |
| Cr3 | O9  | 1.955(9) | Cr3 | O4  | 1.93(1)  | Cr3 | O20 | 1.98(2) |

|     |     |           |     |     |          |    |     |          |
|-----|-----|-----------|-----|-----|----------|----|-----|----------|
| Gd1 | Cr1 | 3.353(2)  | Dy1 | Dy2 | 3.952(1) | Y1 | Cr3 | 3.315(7) |
| Gd1 | Gd3 | 4.0160(7) | Dy1 | Dy3 | 3.966(1) | Y1 | Cr1 | 3.322(5) |
| Gd1 | Cr3 | 3.359(2)  | Dy1 | Cr1 | 3.327(2) | Y2 | Y1  | 3.937(4) |
| Gd2 | Cr2 | 3.351(2)  | Dy1 | Cr3 | 3.326(2) | Y2 | Y3  | 3.983(4) |
| Gd2 | Gd1 | 3.9993(7) | Dy2 | Dy3 | 3.997(1) | Y2 | Cr2 | 3.312(6) |
| Gd2 | Cr1 | 3.372(2)  | Dy2 | Cr1 | 3.345(2) | Y2 | Cr1 | 3.327(6) |
| Gd3 | Cr3 | 3.367(2)  | Dy2 | Cr2 | 3.321(2) | Y3 | Y1  | 3.943(3) |
| Gd3 | Gd2 | 4.0451(7) | Dy3 | Cr2 | 3.325(2) | Y3 | Cr3 | 3.332(6) |
| Gd3 | Cr2 | 3.350(2)  | Dy3 | Cr3 | 3.341(2) | Y3 | Cr2 | 3.313(5) |

| 1   |     |     |         | 2   |     |     |         | 3   |     |     |         |
|-----|-----|-----|---------|-----|-----|-----|---------|-----|-----|-----|---------|
| O13 | Cr1 | O12 | 87.6(4) | N1  | Cr1 | O22 | 94.3(4) | N1  | Cr1 | O6  | 85(1)   |
| N1  | Cr1 | O12 | 94.4(5) | O5  | Cr1 | O22 | 90.1(4) | N1  | Cr1 | O13 | 94(1)   |
| O5  | Cr1 | O12 | 90.2(4) | O2  | Cr1 | O22 | 96.0(4) | O2  | Cr1 | O6  | 85.9(9) |
| O4  | Cr1 | O12 | 95.0(4) | O11 | Cr1 | O22 | 87.8(4) | O5  | Cr1 | O6  | 92(1)   |
| O13 | Cr1 | O6  | 90.0(4) | O11 | Cr1 | O6  | 90.0(4) | O13 | Cr1 | O12 | 88(1)   |
| O4  | Cr1 | O6  | 86.4(4) | O2  | Cr1 | O6  | 86.0(3) | N1  | Cr1 | O12 | 94(1)   |
| N1  | Cr1 | O6  | 84.6(5) | O5  | Cr1 | O6  | 92.0(4) | O5  | Cr1 | O12 | 90(1)   |
| O5  | Cr1 | O6  | 92.1(4) | N1  | Cr1 | O6  | 84.1(4) | O13 | Cr1 | O6  | 90(1)   |
| N2  | Cr2 | O7  | 84.8(4) | O10 | Cr3 | O19 | 90.7(4) | O10 | Cr3 | O21 | 91(1)   |
| N2  | Cr2 | O16 | 94.0(4) | N3  | Cr3 | O19 | 94.7(5) | N3  | Cr3 | O21 | 95(1)   |
| N2  | Cr2 | O17 | 93.9(4) | O18 | Cr3 | O19 | 87.9(4) | O20 | Cr3 | O21 | 88(1)   |
| N2  | Cr2 | O8  | 84.3(4) | O4  | Cr3 | O19 | 94.7(4) | O4  | Cr3 | O21 | 95(1)   |
| O17 | Cr2 | O2  | 94.5(4) | O10 | Cr3 | O9  | 91.2(4) | O10 | Cr3 | O9  | 91(1)   |
| O16 | Cr2 | O2  | 94.3(4) | O4  | Cr3 | O9  | 87.0(4) | O4  | Cr3 | O9  | 87.2(9) |
| O7  | Cr2 | O2  | 87.2(4) | O18 | Cr3 | O9  | 90.1(4) | O20 | Cr3 | O9  | 90(1)   |
| O8  | Cr2 | O2  | 87.8(4) | N3  | Cr3 | O9  | 83.9(5) | N3  | Cr3 | O9  | 83(1)   |
| O10 | Cr3 | O21 | 90.7(4) | O3  | Cr2 | O14 | 94.6(3) | O8  | Cr2 | O17 | 89(1)   |
| O3  | Cr3 | O21 | 94.8(4) | O15 | Cr2 | O14 | 86.3(4) | N2  | Cr2 | O17 | 97(1)   |
| N3  | Cr3 | O21 | 94.6(5) | N2  | Cr2 | O14 | 94.7(4) | O3  | Cr2 | O17 | 93.3(9) |
| O20 | Cr3 | O21 | 87.5(4) | O7  | Cr2 | O14 | 91.1(3) | O16 | Cr2 | O17 | 88(1)   |
| O3  | Cr3 | O9  | 87.2(4) | O3  | Cr2 | O8  | 87.5(3) | O7  | Cr2 | O3  | 87.7(9) |
| O20 | Cr3 | O9  | 90.3(4) | O7  | Cr2 | O8  | 92.4(3) | O7  | Cr2 | O16 | 89(1)   |
| N3  | Cr3 | O9  | 83.8(5) | N2  | Cr2 | O8  | 83.7(4) | O7  | Cr2 | N2  | 82(1)   |
| O10 | Cr3 | O9  | 91.4(4) | O15 | Cr2 | O8  | 90.2(4) | O8  | Cr2 | O7  | 94(1)   |

**Table S2.** *Ab-initio* (MOLCAS-SINGLE\_ANISO) computed single ion parameters of Cr(III) sites in complex **2**.

|                      | Cr(1)               | Cr(2)               | Cr(3)               |
|----------------------|---------------------|---------------------|---------------------|
| $g (g_x, g_y, g_z)$  | 1.969, 1.967, 1.964 | 1.969, 1.968, 1.964 | 1.969, 1.967, 1.964 |
| $D / \text{cm}^{-1}$ | -0.29               | -0.35               | -0.29               |
| $ E/D $              | 0.157               | 0.07                | 0.09                |

**Table S3.** *Ab-initio* (MOLCAS-SINGLE\_ANISO) computed single ion energies and  $g$ -tensors of low lying energy KDs of Dy(III) sites in complex **2**.

| Dy(1)                     |                            |                     | Dy(2)                     |                            |                     | Dy(3)                     |                            |                     |
|---------------------------|----------------------------|---------------------|---------------------------|----------------------------|---------------------|---------------------------|----------------------------|---------------------|
| energy / $\text{cm}^{-1}$ | $g$ tensor $g_x, g_y, g_z$ | comp. / % ( $m_J$ ) | energy / $\text{cm}^{-1}$ | $g$ tensor $g_x, g_y, g_z$ | comp. / % ( $m_J$ ) | energy / $\text{cm}^{-1}$ | $g$ tensor $g_x, g_y, g_z$ | comp. / % ( $m_J$ ) |
| 0.00                      | 0.94, 1.76, 14.5           | 41% (13/2)          | 0.00                      | 0.05, 0.06, 19.33          | 90% (15/2)          | 0.00                      | 0.05, 0.09, 19.23          | 88% (15/2)          |
| 0.00                      |                            |                     | 0.00                      |                            |                     | 0.00                      |                            |                     |
| 20.83                     | 1.17, 3.22, 10.73          | 29% (11/2)          | 79.53                     | 0.65, 0.90, 15.63          | 66% (13/2)          | 72.06                     | 0.26, 0.35, 16.32          | 73% (13/2)          |
| 20.83                     |                            |                     | 79.53                     |                            |                     | 72.06                     |                            |                     |
| 46.05                     | 1.95, 5.14, 10.23          | 44% (9/2)           | 123.75                    | 3.46, 5.70, 9.01           | 35% (11/2)          | 119.23                    | 1.59, 3.14, 13.47          | 30% (9/2)           |
| 46.05                     |                            |                     | 123.75                    |                            |                     | 119.23                    |                            |                     |
| 60.23                     | 0.17, 3.32, 11.73          | 22% (11/2)          | 146.07                    | 0.75, 3.11, 12.34          | 30% (5/2)           | 141.23                    | 0.85, 3.27, 13.10          | 28% (3/2)           |
| 60.23                     |                            |                     | 146.07                    |                            |                     | 141.23                    |                            |                     |
| 67.98                     | 1.70, 4.55, 10.86          | 32% (5/2)           | 156.16                    | 2.69, 3.47, 11.22          | 29% (1/2)           | 162.16                    | 3.31, 5.79, 10.50          | 30% (7/2)           |
| 67.98                     |                            |                     | 156.16                    |                            |                     | 162.16                    |                            |                     |
| 92.18                     | 2.24, 3.32, 13.35          | 34% (3/2)           | 170.65                    | 1.36, 2.14, 13.02          | 36% (3/2)           | 188.91                    | 0.14, 0.90, 17.18          | 55% (1/2)           |
| 92.18                     |                            |                     | 170.65                    |                            |                     | 188.91                    |                            |                     |
| 118.41                    | 0.38, 0.92, 18.47          | 52% (1/2)           | 191.81                    | 0.78, 3.53, 15.95          | 31% (7/2)           | 207.44                    | 0.28, 1.73, 16.19          | 39% (5/2)           |
| 118.41                    |                            |                     | 191.81                    |                            |                     | 207.44                    |                            |                     |
| 378.27                    | 0.00, 0.00, 19.96          | 58% (15/2)          | 465.52                    | 0.00, 0.00, 19.95          | 25% (9/2)           | 473.32                    | 0.00, 0.00, 19.93          | 27% (9/2)           |
| 378.27                    |                            |                     | 465.52                    |                            |                     | 473.32                    |                            |                     |

**Table S4.** CHELPG-DFT computed charges of Dy(III) coordinate oxygen atoms and Dy-O bond distances in complex **2**.

| Dy1                |               |    |          | Dy2                |               |    |          | Dy3                |               |    |          |
|--------------------|---------------|----|----------|--------------------|---------------|----|----------|--------------------|---------------|----|----------|
|                    | charge        | %  | Dy-O / Å |                    | charge        | %  | Dy-O / Å |                    | charge        | %  | Dy-O / Å |
| $\mu$ -OH (O1)     | -1.438        | 22 | 2.390(8) | $\mu$ -OH (O1)     | -1.438        | 23 | 2.402(8) | $\mu$ -OH (O1)     | -1.438        | 23 | 2.418(7) |
| aqua (O27)         | -0.964        | 15 | 2.38(1)  | $\mu$ -piv (O23)   | -0.853        | 13 | 2.35(1)  | $\mu$ -OH (O4)     | -0.823        | 13 | 2.386(8) |
| $\mu$ -OH (O2)     | -0.829        | 13 | 2.400(8) | $\mu$ -OH (O2)     | -0.829        | 13 | 2.377(7) | $\mu$ -piv (O25)   | -0.787        | 12 | 2.35(1)  |
| $\mu$ -OH (O4)     | -0.823        | 13 | 2.422(7) | tea (O7)           | -0.778        | 12 | 2.323(8) | $\mu_2$ -piv (O16) | -0.667        | 10 | 2.388(8) |
| tea (O10)          | -0.703        | 11 | 2.315(9) | tea (O6)           | -0.754        | 12 | 2.333(8) | $\mu_2$ -piv (O17) | -0.659        | 10 | 2.388(7) |
| $\mu_2$ -piv (O21) | -0.693        | 11 | 2.370(9) | $\mu_2$ -piv (O13) | -0.734        | 12 | 2.386(9) | tea (O8)           | -0.655        | 10 | 2.316(7) |
| $\mu_2$ -piv (O20) | -0.669        | 10 | 2.359(7) | $\mu_2$ -piv (O12) | -0.686        | 11 | 2.406(8) | $\mu$ -OH (O3)     | -0.555        | 9  | 2.405(8) |
| tea (O5)           | -0.661        | 10 | 2.322(7) | $\mu$ -OH (O3)     | -0.555        | 9  | 2.394(7) | tea (O9)           | -0.536        | 8  | 2.35(1)  |
| <b>Total</b>       | <b>-6.627</b> |    |          |                    | <b>-6.120</b> |    |          |                    | <b>-6.780</b> |    |          |

**Table S5.** Matrix main values (after diagonalization) of projected (onto effective Dy(III)  $s=1/2$  ground KD) exchange and dipolar magnetic interactions as arising from MOLCAS/POLY\_ANISO based experimental data fitting.

|                               | Dy1-Dy2       | Dy1- Dy3      | Dy2- Dy3      | Cr1-Dy2       | Cr1-Dy1       | Cr2-Dy2       | Cr2-Dy3       | Cr3-Dy3       | Cr3-Dy1       |
|-------------------------------|---------------|---------------|---------------|---------------|---------------|---------------|---------------|---------------|---------------|
| $J_{exc} / \text{cm}^{-1}$    |               |               |               |               |               |               |               |               |               |
| x                             | -0.058        | -0.024        | 0.366         | 1.428         | -2.087        | 2.355         | 1.299         | -1.486        | 0.816         |
| y                             | 0.017         | 0.001         | 0.000         | -0.342        | 0.020         | -2.014        | -0.015        | -0.011        | 0.290         |
| z                             | 0.000         | 0.024         | -0.129        | 0.000         | 0.520         | 0.013         | -2.916        | 2.534         | -1.742        |
| <b>isotropic contribution</b> | <b>-0.014</b> | <b>0.001</b>  | <b>0.079</b>  | <b>0.362</b>  | <b>-0.516</b> | <b>0.118</b>  | <b>-0.544</b> | <b>0.346</b>  | <b>-0.212</b> |
| $J_{dip} / \text{cm}^{-1}$    |               |               |               |               |               |               |               |               |               |
| x                             | 0.377         | 0.406         | -0.900        | 0.017         | 0.061         | -0.101        | 0.031         | -0.053        | 0.061         |
| y                             | -0.303        | 0.001         | 0.000         | -0.018        | -0.028        | 0.061         | 0.000         | 0.062         | 0.010         |
| z                             | 0.000         | -0.200        | 0.318         | 0.000         | 0.001         | 0.000         | -0.087        | 0.001         | -0.058        |
| <b>isotropic contribution</b> | <b>0.025</b>  | <b>0.069</b>  | <b>-0.194</b> | <b>0.000</b>  | <b>0.012</b>  | <b>-0.013</b> | <b>-0.019</b> | <b>0.003</b>  | <b>0.004</b>  |
| $J_{total} / \text{cm}^{-1}$  |               |               |               |               |               |               |               |               |               |
| <b>isotropic contribution</b> | <b>0.070</b>  | <b>-0.115</b> | <b>0.362</b>  | <b>-0.504</b> | <b>0.105</b>  | <b>-0.563</b> | <b>0.349</b>  | <b>-0.208</b> | <b>0.000</b>  |

**Table S6.** Fitting parameters of AC magnetic data frequency dependence under variable temperature and variable DC magnetic field (2 K) , through a generalized Debye model.

|         | $T$<br>/ K | $\chi_{S1}$<br>/cm <sup>3</sup> mol <sup>-1</sup> | $\chi_{T1}$<br>/cm <sup>3</sup> mol <sup>-1</sup> | $\chi_{S2}$<br>/cm <sup>3</sup> mol <sup>-1</sup> | $\chi_{T2}$<br>/cm <sup>3</sup> mol <sup>-1</sup> | $\alpha_1$ | $\alpha_2$ | $\tau_1$<br>/ s | $\tau_2$<br>/ s |
|---------|------------|---------------------------------------------------|---------------------------------------------------|---------------------------------------------------|---------------------------------------------------|------------|------------|-----------------|-----------------|
| 0 Oe    | 2          | 1.29                                              | 3.82                                              | 1.81                                              | 10.26                                             | 0.19       | 0.23       | 7.43E-04        | 4.74E-05        |
|         | 2.2        | 1.29                                              | 3.20                                              | 1.54                                              | 10.20                                             | 0.17       | 0.26       | 3.80E-04        | 2.32E-05        |
|         | 2.3        | 1.13                                              | 2.47                                              | 1.40                                              | 10.20                                             | 0.13       | 0.28       | 1.94E-04        | 1.14E-05        |
|         | 2.5        | 1.13                                              | 1.95                                              | 0.01                                              | 10.05                                             | 0.06       | 0.35       | 8.45E-05        | 4.25E-06        |
|         | 2.7        | 1.13                                              | 1.77                                              | 0.01                                              | 9.54                                              | 0.00       | 0.32       | 4.76E-05        | 2.24E-06        |
|         | 3          | 1.13                                              | 1.67                                              | 0.01                                              | 9.04                                              | 0.02       | 0.29       | 2.72E-05        | 1.23E-06        |
|         | 3.2        | 1.13                                              | 1.58                                              | 0.01                                              | 8.53                                              | 0.07       | 0.20       | 1.89E-05        | 8.50E-07        |
|         | 3.4        | 1.05                                              | 1.55                                              | 0.00                                              | 8.03                                              | 0.00       | 0.23       | 8.37E-06        | 3.29E-07        |
| 1500 Oe | 2.0        | 1.09                                              | 3.48                                              | 5.08                                              | 10.03                                             | 0.28       | 0.18       | 7.58E-04        | 4.11E-05        |
|         | 2.2        | 0.90                                              | 3.16                                              | 5.08                                              | 10.27                                             | 0.30       | 0.20       | 3.29E-04        | 1.96E-05        |
|         | 2.3        | 0.55                                              | 2.84                                              | 5.08                                              | 10.40                                             | 0.33       | 0.22       | 1.22E-04        | 8.61E-06        |
|         | 2.5        | 0.55                                              | 2.86                                              | 4.25                                              | 10.08                                             | 0.31       | 0.23       | 4.70E-05        | 3.20E-06        |
|         | 2.7        | 0.14                                              | 3.45                                              | 4.19                                              | 9.23                                              | 0.30       | 0.00       | 1.59E-05        | 1.39E-06        |
|         | 3.0        | 0.14                                              | 2.86                                              | 3.32                                              | 9.49                                              | 0.24       | 0.00       | 9.74E-06        | 6.48E-07        |
|         | 3.2        | 0.00                                              | 2.88                                              | 3.31                                              | 9.17                                              | 0.23       | 0.00       | 4.28E-06        | 2.63E-07        |
| 3000 Oe | 2.0        | 0.43                                              | 1.26                                              | 0.23                                              | 2.89                                              | 0.23       | 0.24       | 6.86E-04        | 2.88E-05        |
|         | 2.2        | 0.39                                              | 1.51                                              | 0.19                                              | 2.92                                              | 0.36       | 0.23       | 2.93E-04        | 1.36E-05        |
|         | 2.3        | 0.37                                              | 1.25                                              | 0.19                                              | 3.28                                              | 0.27       | 0.23       | 1.67E-04        | 7.54E-06        |
|         | 2.5        | 0.30                                              | 1.71                                              | 0.19                                              | 2.96                                              | 0.35       | 0.15       | 4.58E-05        | 3.42E-06        |
|         | 2.7        | 0.00                                              | 2.08                                              | 0.00                                              | 2.65                                              | 0.34       | 0.00       | 1.22E-05        | 1.36E-06        |
|         | 3.0        | 0.00                                              | 1.73                                              | 0.00                                              | 3.02                                              | 0.30       | 0.00       | 8.31E-06        | 8.28E-07        |

| <i>H</i> /<br>Oe | $\chi_{S1}$<br>/cm <sup>3</sup> mol <sup>-1</sup> | $\chi_{T1}$<br>/cm <sup>3</sup> mol <sup>-1</sup> | $\chi_{S2}$<br>/cm <sup>3</sup> mol <sup>-1</sup> | $\chi_{T2}$<br>/cm <sup>3</sup> mol <sup>-1</sup> | $\alpha_1$ | $\alpha_2$ | $\tau_1$<br>/ s | $\tau_2$<br>/ s |
|------------------|---------------------------------------------------|---------------------------------------------------|---------------------------------------------------|---------------------------------------------------|------------|------------|-----------------|-----------------|
| 0                | 0.00                                              | 3.44                                              | 4.74                                              | 11.69                                             | 0.17       | 0.23       | 8.39E-04        | 5.43E-05        |
| 200              | 0.00                                              | 3.44                                              | 4.71                                              | 11.50                                             | 0.18       | 0.22       | 7.93E-04        | 5.67E-05        |
| 400              | 0.08                                              | 3.44                                              | 4.71                                              | 11.28                                             | 0.15       | 0.20       | 9.39E-04        | 6.18E-05        |
| 600              | 0.08                                              | 3.44                                              | 4.71                                              | 10.80                                             | 0.18       | 0.19       | 8.79E-04        | 6.19E-05        |
| 800              | 0.12                                              | 3.44                                              | 4.71                                              | 10.30                                             | 0.17       | 0.17       | 8.37E-04        | 5.92E-05        |
| 1000             | 0.10                                              | 3.44                                              | 4.71                                              | 10.09                                             | 0.18       | 0.18       | 1.05E-03        | 5.83E-05        |
| 1200             | 0.13                                              | 2.90                                              | 4.69                                              | 9.71                                              | 0.14       | 0.18       | 8.56E-04        | 5.40E-05        |
| 1400             | 0.12                                              | 2.90                                              | 4.69                                              | 9.27                                              | 0.19       | 0.19       | 9.31E-04        | 5.01E-05        |
| 1600             | 0.14                                              | 2.50                                              | 4.67                                              | 8.84                                              | 0.18       | 0.19       | 7.66E-04        | 4.57E-05        |
| 1800             | 0.14                                              | 2.50                                              | 4.67                                              | 8.44                                              | 0.22       | 0.20       | 8.16E-04        | 4.23E-05        |
| 2000             | 0.21                                              | 2.13                                              | 4.62                                              | 8.11                                              | 0.18       | 0.20       | 7.13E-04        | 4.01E-05        |

**Table S7.** DFT computed high spin (HS) and broken symmetry (BS) states spin density and energy values of complexes **1-3**. Spin densities in bold type shows the sites where spin was flipped.

| <b>1 Gd<sub>3</sub>Cr<sub>3</sub></b> |                  |                  |                  |                  |                  |                  |                     |
|---------------------------------------|------------------|------------------|------------------|------------------|------------------|------------------|---------------------|
|                                       | spin density     |                  |                  |                  |                  |                  | energy<br>/hartrees |
|                                       | Gd1              | Gd2              | Gd3              | Cr1              | Cr2              | Cr3              |                     |
| HS                                    | 7.030636         | 7.019895         | 7.022084         | 3.103535         | 3.103966         | 3.104018         | -42171.26435364     |
| BS1                                   | 7.025827         | 7.029480         | 7.018649         | <b>-3.100190</b> | 3.103821         | 3.103884         | -42171.26461822     |
| BS2                                   | 7.027005         | 7.024539         | 7.022595         | 3.103345         | <b>-3.101652</b> | 3.103895         | -42171.26463101     |
| BS3                                   | 7.033495         | 7.016355         | 7.032389         | 3.103685         | 3.103691         | <b>-3.099802</b> | -42171.26463770     |
| BS4                                   | <b>-7.021467</b> | 7.020622         | 7.021698         | 3.101442         | 3.104122         | 3.101727         | -42171.26465029     |
| BS5                                   | 7.028550         | <b>-7.030868</b> | 7.021890         | 3.102295         | 3.102384         | 3.104133         | -42171.26460572     |
| BS6                                   | 7.029108         | 7.019447         | <b>-7.028892</b> | 3.103547         | 3.103483         | 3.102225         | -42171.26462936     |
| BS7                                   | 7.022198         | 7.034130         | 7.019156         | <b>-3.100373</b> | <b>-3.101794</b> | 3.103761         | -42171.26489414     |
| BS8                                   | 7.029871         | 7.020996         | 7.032903         | 3.103496         | <b>-3.101919</b> | <b>-3.099923</b> | -42171.26491406     |
| BS9                                   | 7.028697         | 7.025938         | 7.028949         | <b>-3.100035</b> | 3.103548         | <b>-3.099930</b> | -42171.26490169     |
| BS10                                  | <b>-7.023550</b> | <b>-7.030139</b> | 7.021505         | 3.100205         | 3.102541         | 3.101843         | -42171.26490073     |
| BS11                                  | 7.027025         | <b>-7.031317</b> | <b>-7.029081</b> | 3.102309         | 3.101903         | 3.102339         | -42171.26488297     |

|                                       |                     |                  |                  |                  |                  |                  |                  |
|---------------------------------------|---------------------|------------------|------------------|------------------|------------------|------------------|------------------|
| BS12                                  | <b>-7.022988</b>    | 7.020177         | <b>-7.029279</b> | 3.101455         | 3.103641         | 3.099935         | -42171.26492424  |
| <b>2 Dy<sub>3</sub>Cr<sub>3</sub></b> |                     |                  |                  |                  |                  |                  |                  |
|                                       | <b>spin density</b> |                  |                  |                  |                  |                  | <b>energy</b>    |
|                                       | <b>Dy1</b>          | <b>Dy2</b>       | <b>Dy3</b>       | <b>Cr1</b>       | <b>Cr2</b>       | <b>Cr3</b>       | <b>/hartrees</b> |
| HS                                    | 5.012296            | 5.008149         | 5.008876         | 3.096606         | 3.100598         | 3.102621         | -44860.53125569  |
| BS1                                   | 5.011670            | 5.008145         | 5.004826         | <b>-3.098220</b> | 3.100359         | 3.102516         | -44860.53133291  |
| BS2                                   | 5.008482            | 5.009443         | 5.009557         | 3.096468         | <b>-3.101294</b> | 3.102492         | -44860.53138059  |
| BS3                                   | 5.015293            | 5.003634         | 5.016460         | 3.096752         | 3.100346         | <b>-3.101914</b> | -44860.53143496  |
| BS4                                   | <b>-5.006657</b>    | 5.006200         | 5.009662         | 3.097846         | 3.100599         | 3.102276         | -44860.53139673  |
| BS5                                   | 5.011540            | <b>-4.997276</b> | 5.005657         | 3.096919         | 3.101236         | 3.102520         | -44860.53138684  |
| BS6                                   | 5.008869            | 5.002439         | <b>-5.010655</b> | 3.096643         | 3.101135         | 3.102591         | -44860.53135976  |
| BS7                                   | <b>-5.007282</b>    | 5.006189         | 5.005611         | <b>-3.096971</b> | 3.100360         | 3.102177         | -44860.53139249  |
| BS8                                   | 5.007723            | <b>-4.995979</b> | 5.006337         | 3.096787         | <b>-3.100651</b> | 3.102391         | -44860.53131721  |
| BS9                                   | 5.011863            | 4.997927         | <b>-5.003073</b> | 3.096790         | 3.100889         | <b>-3.101944</b> | -44860.53137956  |
| <b>3 Y<sub>3</sub>Cr<sub>3</sub></b>  |                     |                  |                  |                  |                  |                  |                  |
|                                       | <b>spin density</b> |                  |                  |                  |                  |                  | <b>energy</b>    |
|                                       | <b>Cr1</b>          |                  | <b>Cr2</b>       |                  | <b>Cr3</b>       |                  | <b>/hartrees</b> |
| HS                                    | 3.110680            |                  | 3.130028         |                  | 3.113920         |                  | -7681.58091298   |
| BS1                                   | <b>-3.110330</b>    |                  | 3.129907         |                  | 3.113777         |                  | -7681.58091320   |
| BS2                                   | 3.110513            |                  | <b>-3.129396</b> |                  | 3.113690         |                  | -7681.58091349   |
| BS3                                   | 3.110498            |                  | 3.129516         |                  | <b>-3.113547</b> |                  | -7681.58091317   |



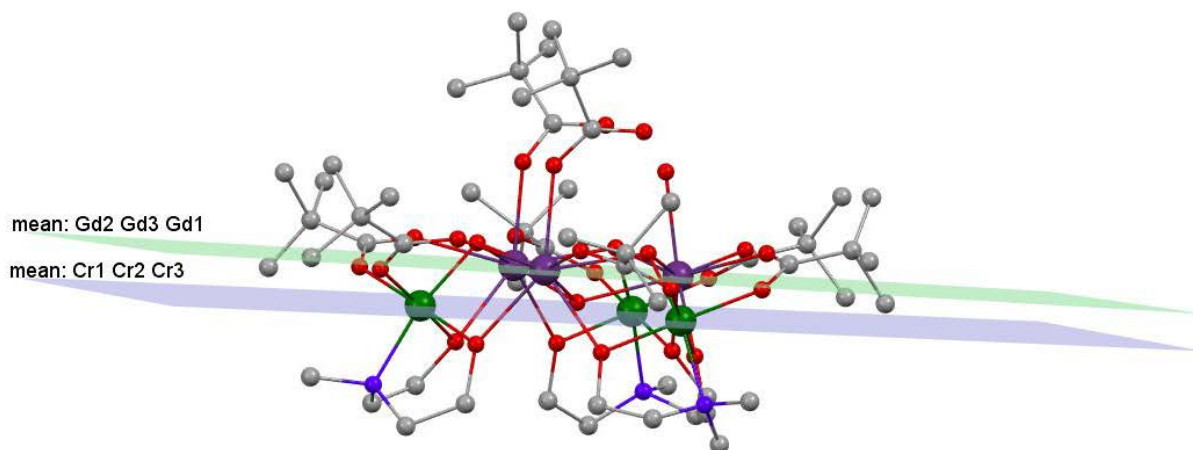

**Figure S1.** Molecular planes containing all Gd and all Cr atoms running parallel (angle between planes *ca.* 1°) and shifted *ca.* 1 Å. Complex **1** is chosen as example of all isostructural complexes **1-3**. Hydrogen atoms as well as disordered moieties have been omitted to improve visualization. Colour code: C: grey; O: red; N: blue; Cr: green and Gd: violet.

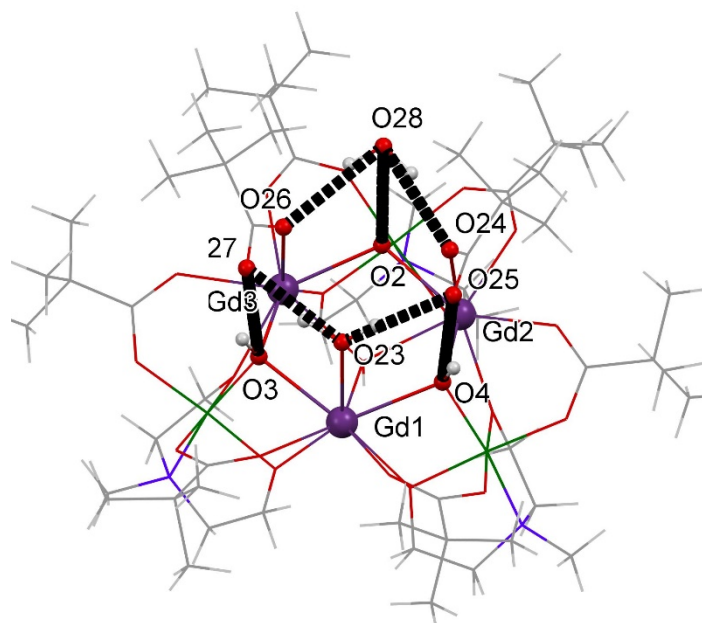

**Figure S2.** Intra-molecular H-bonding network (involving one solvent water molecule, O28) in complex **1** structure. Complex **1** is chosen as example of all isostructural complexes **1-3**. Colour code: C: grey; O: red; N: blue; Cr: green and Gd: violet.

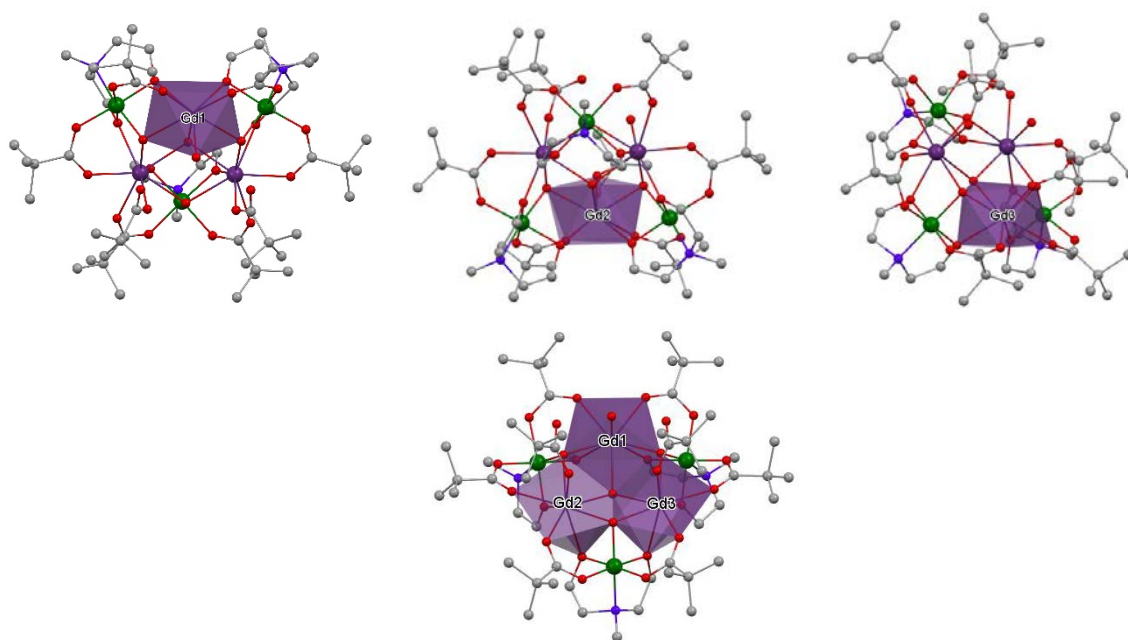

**Figures S3.** Polyhedral representation of Gd sites in complex **1**. Complex **1** is chosen as example of all isostructural complexes **1-3**. Hydrogen atoms as well as disordered moieties have been omitted to improve visualization. Colour code: C: grey; O: red; N: blue; Cr: green and Gd: violet.

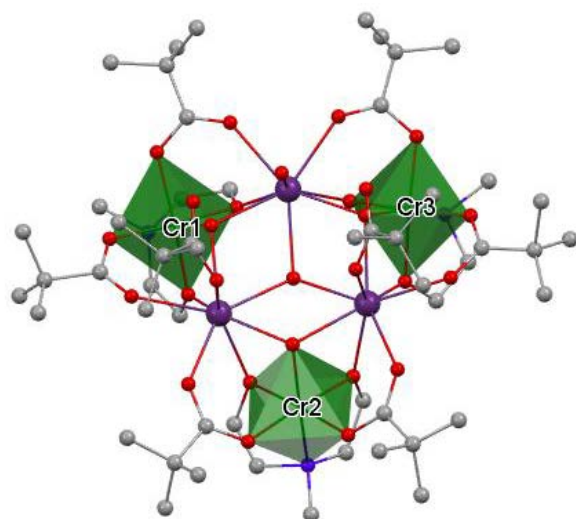

**Figures S4.** Polyhedral representation of Cr sites in complex **1**. Complex **1** is chosen as example of all isostructural complexes **1-3**. Hydrogen atoms as well as disordered moieties have been omitted to improve visualization. Colour code: C: grey; O: red; N: blue; Cr: green and Gd: violet.

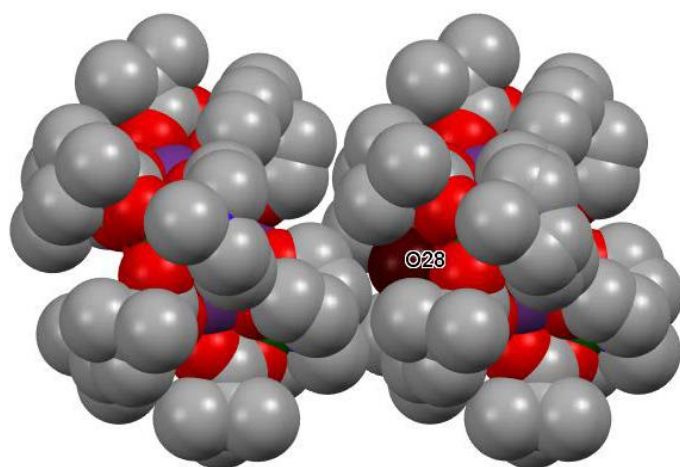

**Figure S5.** Spacefill representation of adjacent complex **1** molecules, showing the encapsulated solvent water molecules (O28). Complex **1** is chosen as example of all isostructural complexes **1-3**. Hydrogen atoms as well as disordered moieties have been omitted to improve visualization. Colour code: C: grey; O: red; N: blue; Cr: green and Gd: violet.

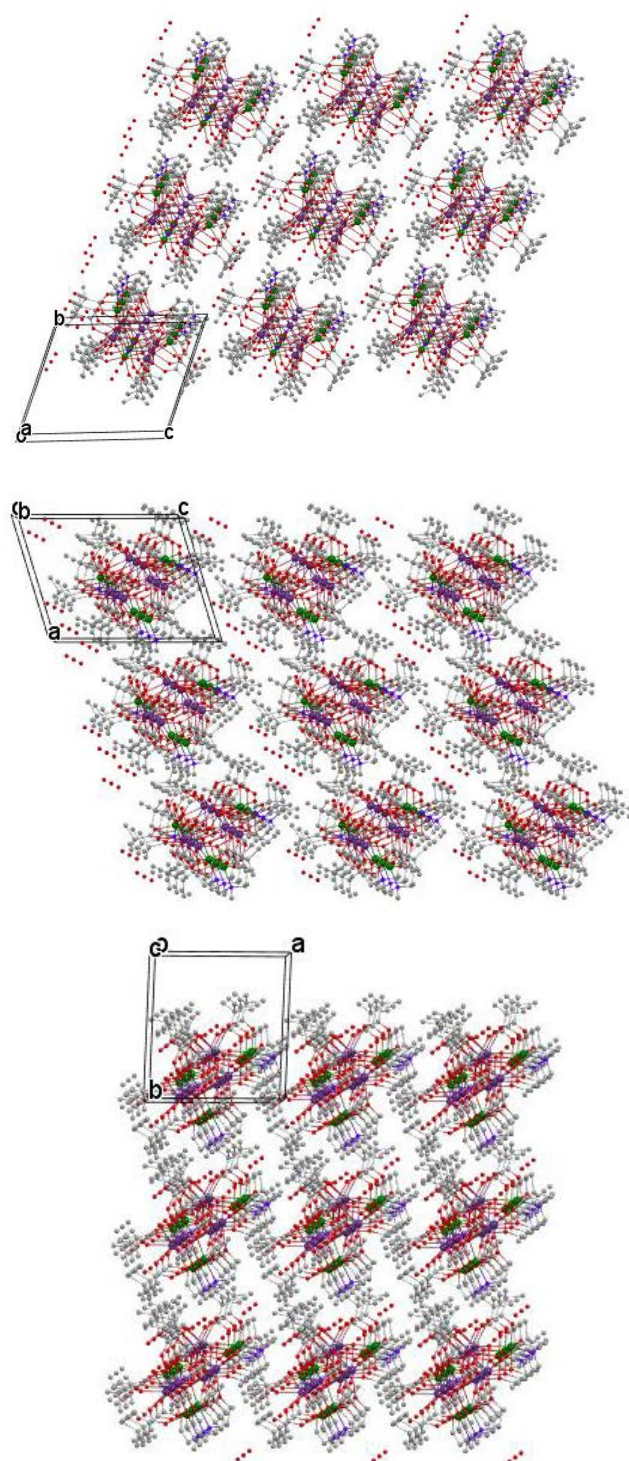

**Figure S6.** Crystal packing of complex **1** view along unit cell directions: *a*, *b* and *c* axis from top to bottom respectively. Complex **1** is chosen as example of all isostructural complexes **1-3**. Hydrogen atoms have been omitted to improve visualization. Colour code: C: grey; O: red; N: blue; Cr: green and Gd: violet.

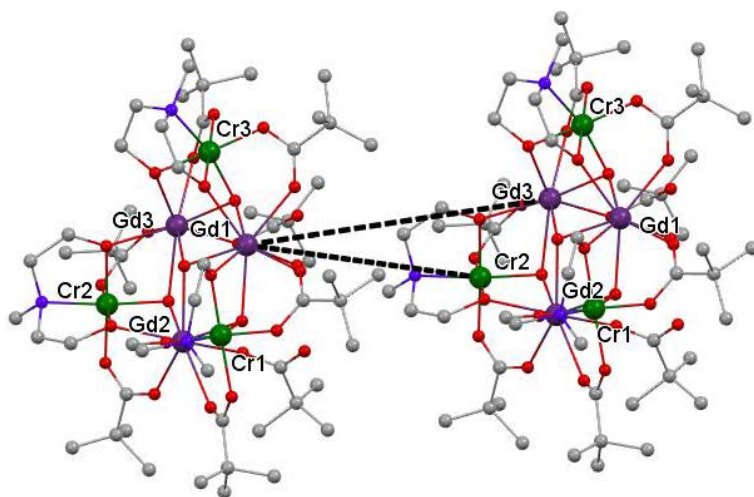

**Figure S7.** Shortest inter-molecular metal-metal distance and Ln $\cdots$ Ln distance. Complex **1** is chosen as example of all isostructural complexes **1-3**. Hydrogen atoms as well as disordered moieties have been omitted to improve visualization. Colour code: C: grey; O: red; N: blue; Cr: green and Gd: violet.

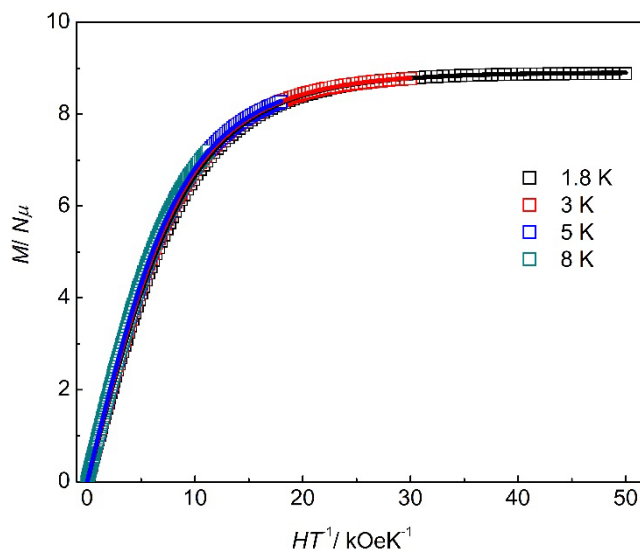

**Figure S8.** Reduced magnetization data plot of complex **3**. Open symbols: experimental data; Full lines: simulated data with model described in the text.

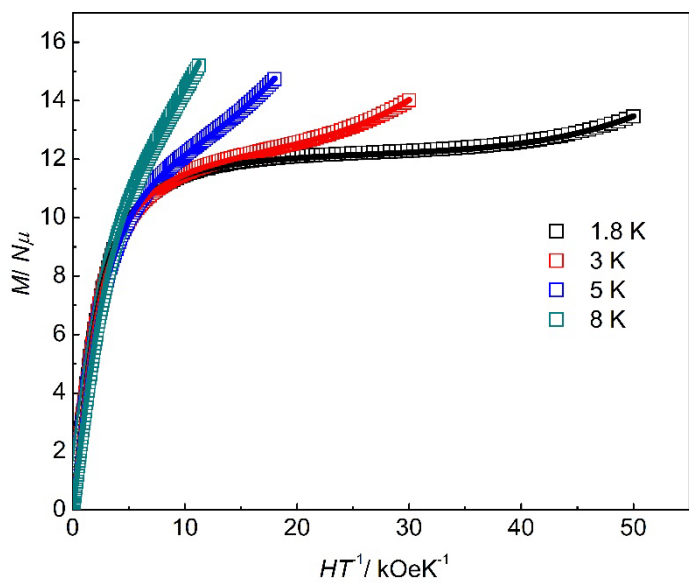

**Figure S9.** Reduced magnetization data plot of complex **1**. Open symbols: experimental data; Full lines: simulated data with model described in the text.

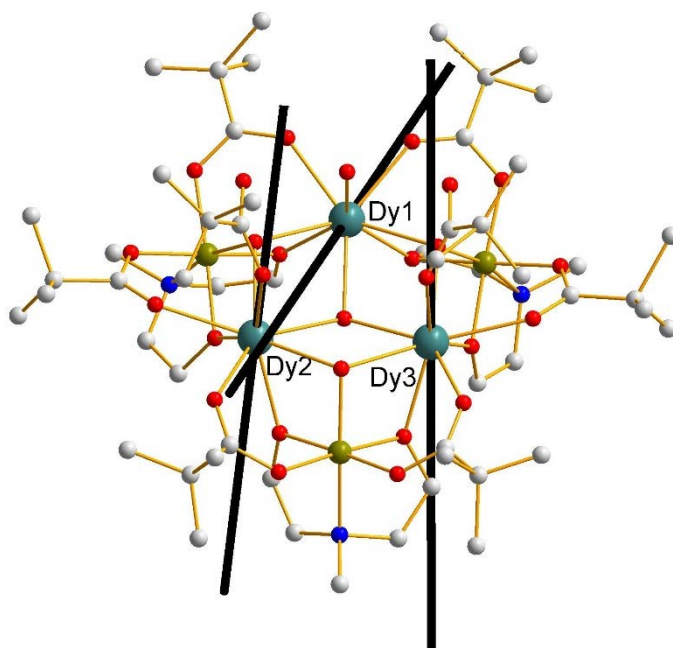

**Figure S10.** Local main magnetic moment quantization axis orientation at each Dy(III) site in complex **2**, as arising from MOLCAS/SINGLE\_ANISO quantum computations.



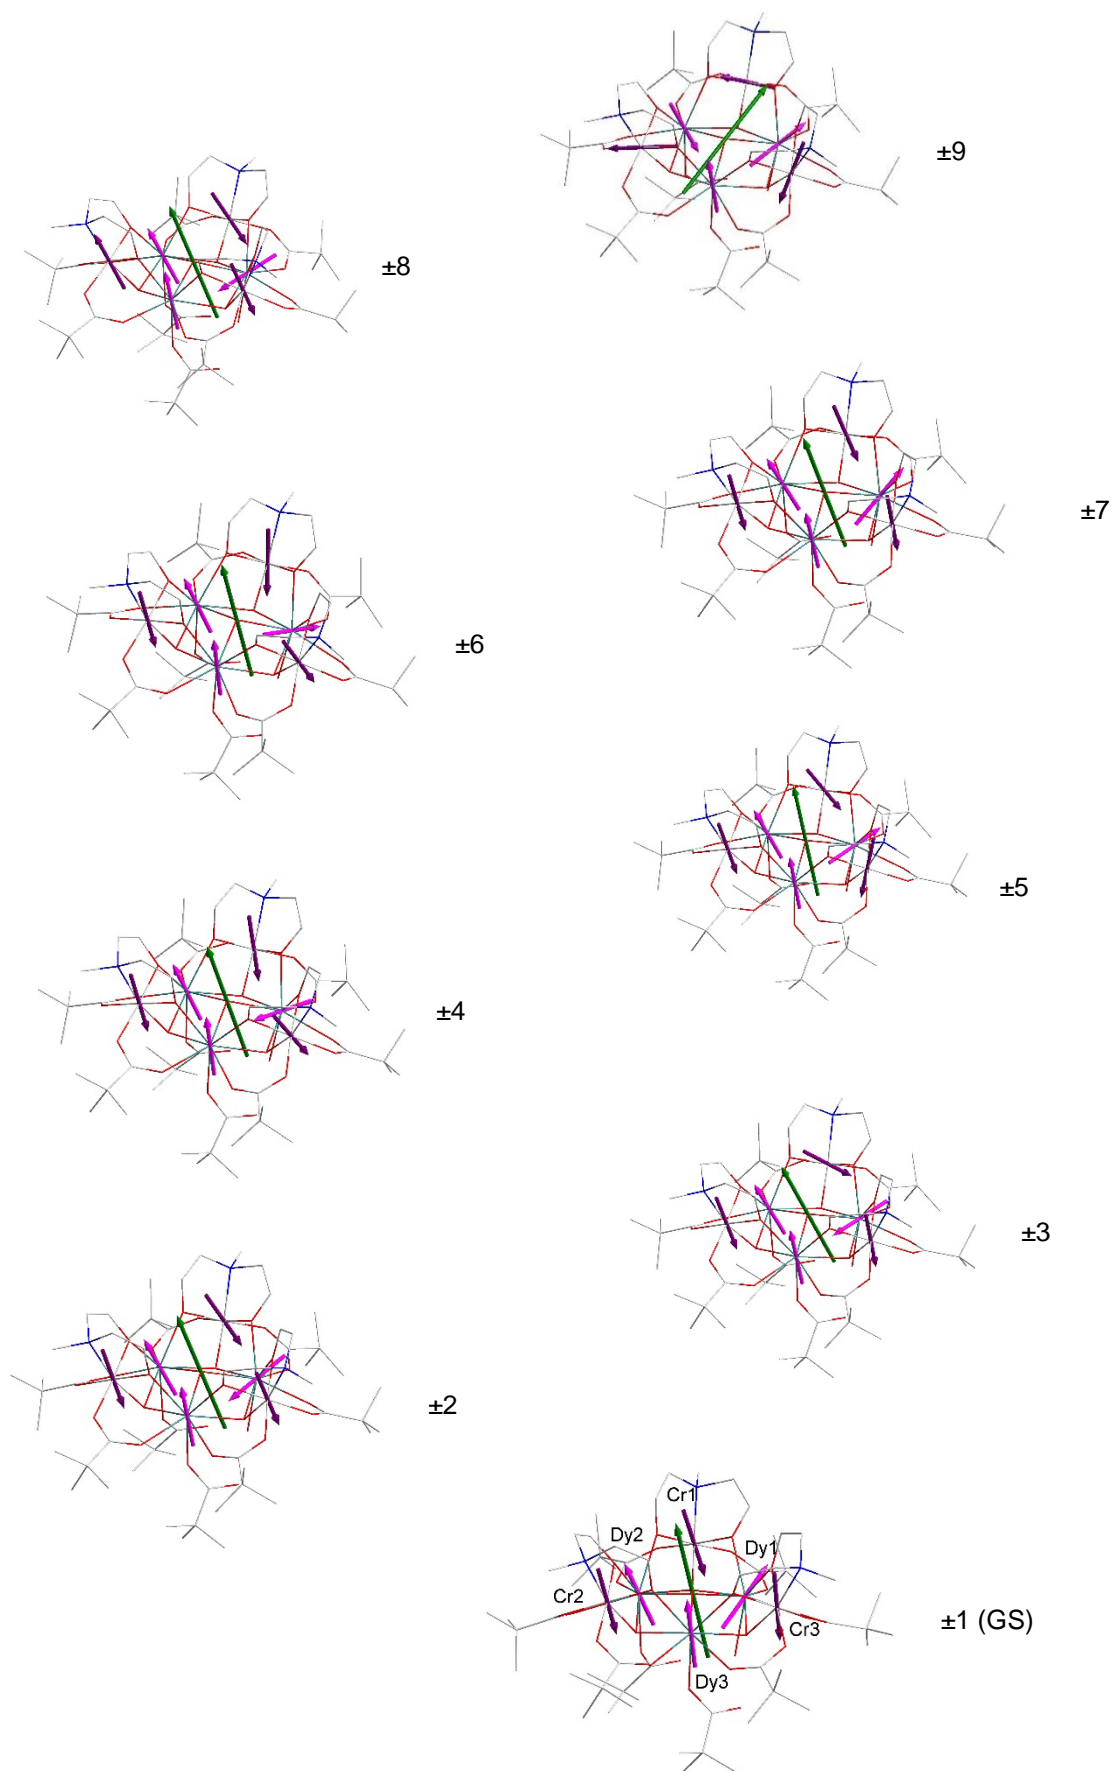

**FigureS11.** Local magnetic moment orientations within low lying exchange states in complex **2** as arising from MOLCAS/POLY\_ANISO computation.

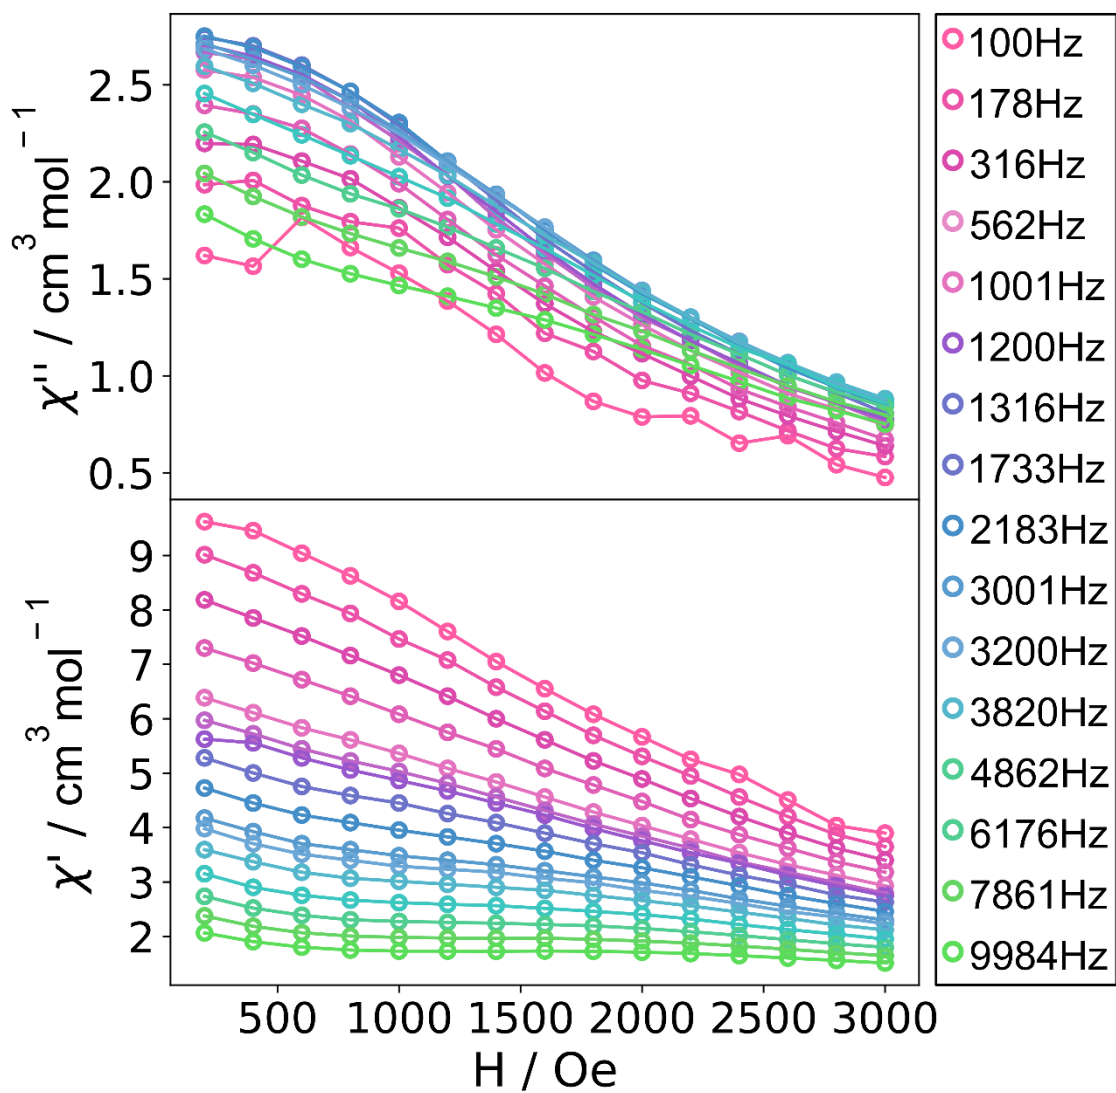

**FigureS12.** AC magnetic susceptibility data of complex **2** at 2 K under DC applied magnetic field (0-3 kOe) and variable frequency (up to 10 kHz). Lines are only drawn as eye guideline.



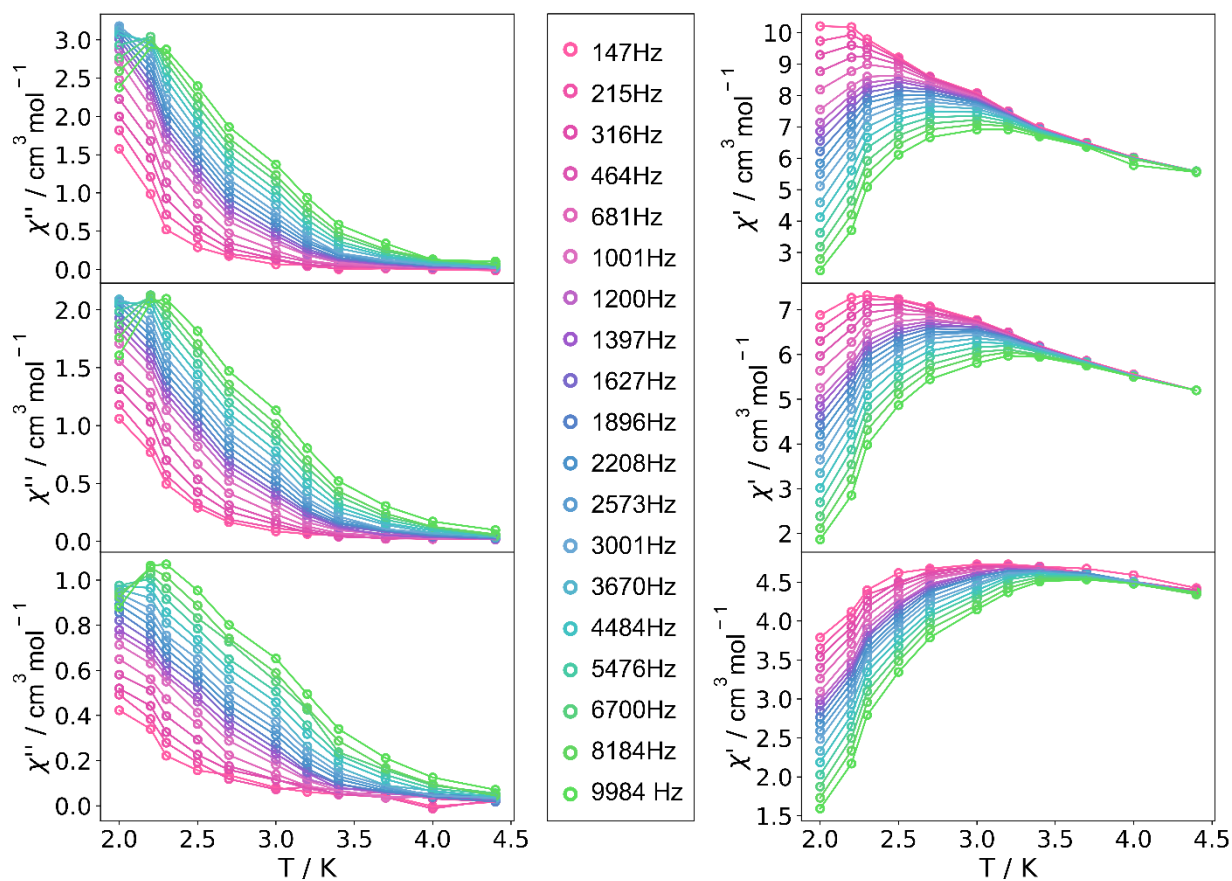

**Figures S13.**  $\chi''$  (left) and  $\chi'$  (right) temperature dependence with frequencies up to 10 kHz at 0 Oe (top), 1500 Oe (middle) and 3000 Oe (bottom) applied DC magnetic fields for complex **2**. Open symbols: experimental data; Full lines: eye guidelines.

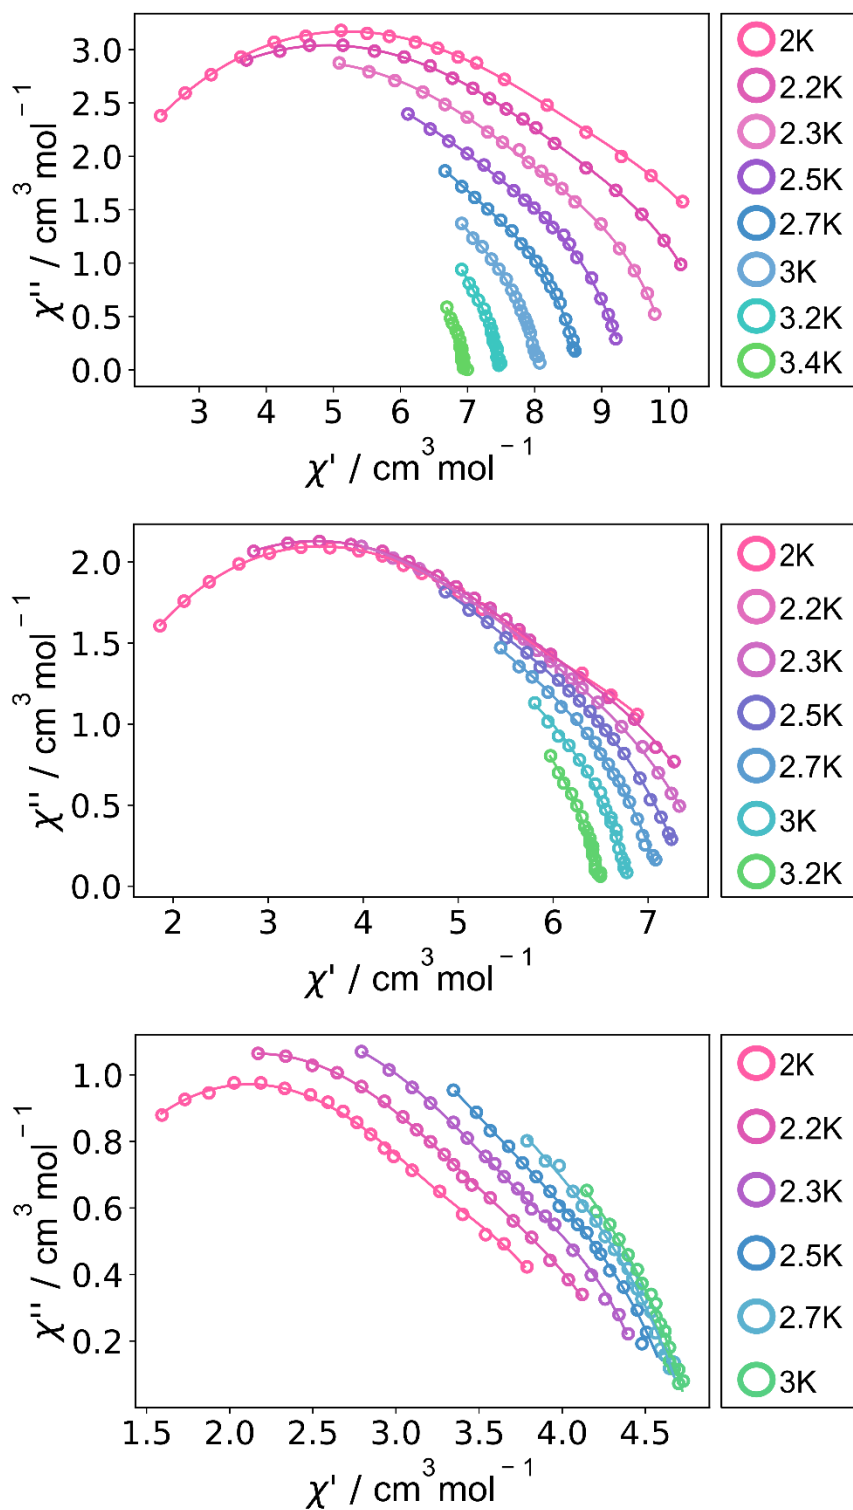

**Figure S14.** Cole-Cole plots of AC magnetic data for complex **2** at 0 Oe (top); 1500 Oe (middle) and 3000 Oe (bottom) DC magnetic field. Open symbols: experimental data; full lines: simulated data with generalized Debye model (see text).

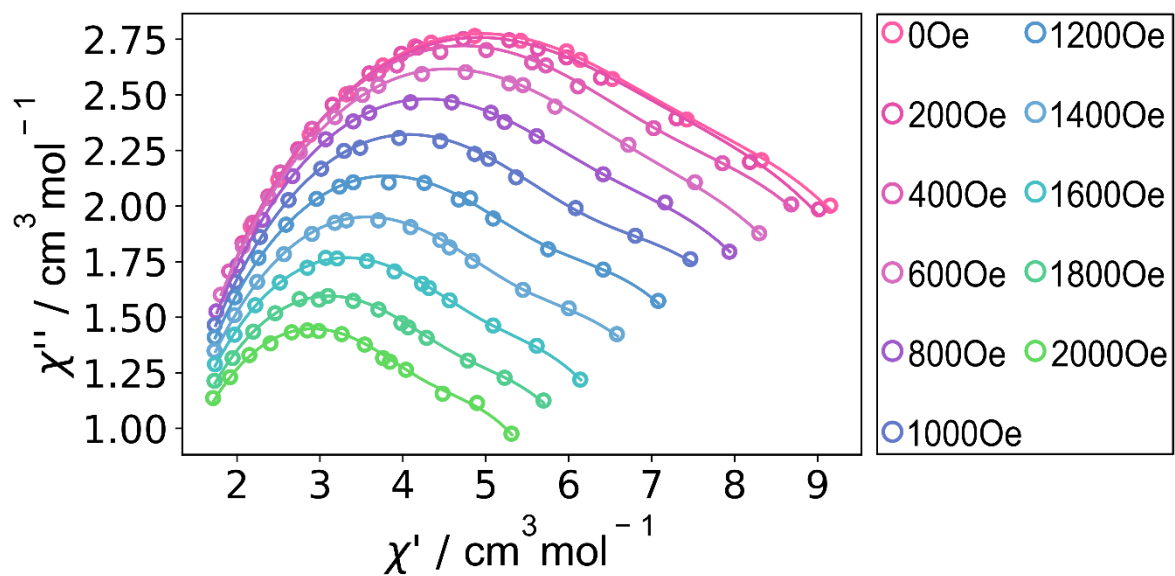

**Figures S15.** Cole-Cole plots of AC magnetic data for complex **2** at 2K under DC magnetic fields between 0 and 2000 Oe. Open symbols: experimental data; full lines: simulated data with generalized Debye model (see text).

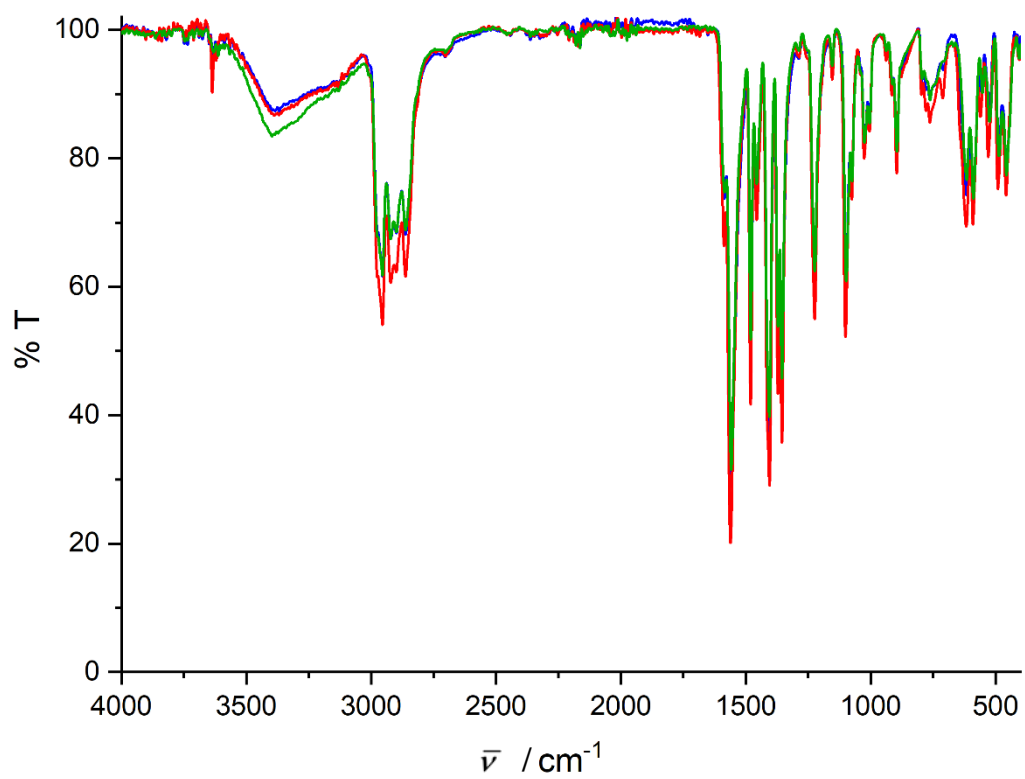

**Figures S16.** Infrared spectra of reported complexes **1-Gd** (green), **2-Dy** (blue) and **3-Y** (red).

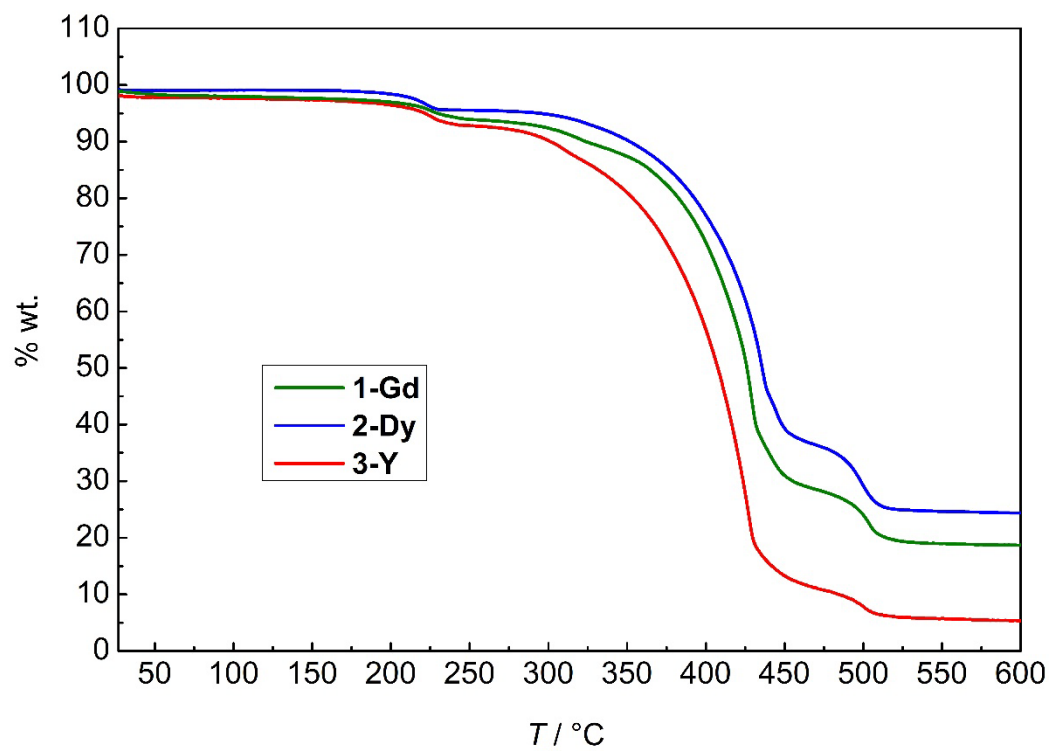

**Figures S17.** Thermogravimetric (TGA) data of reported complexes **1-3**.

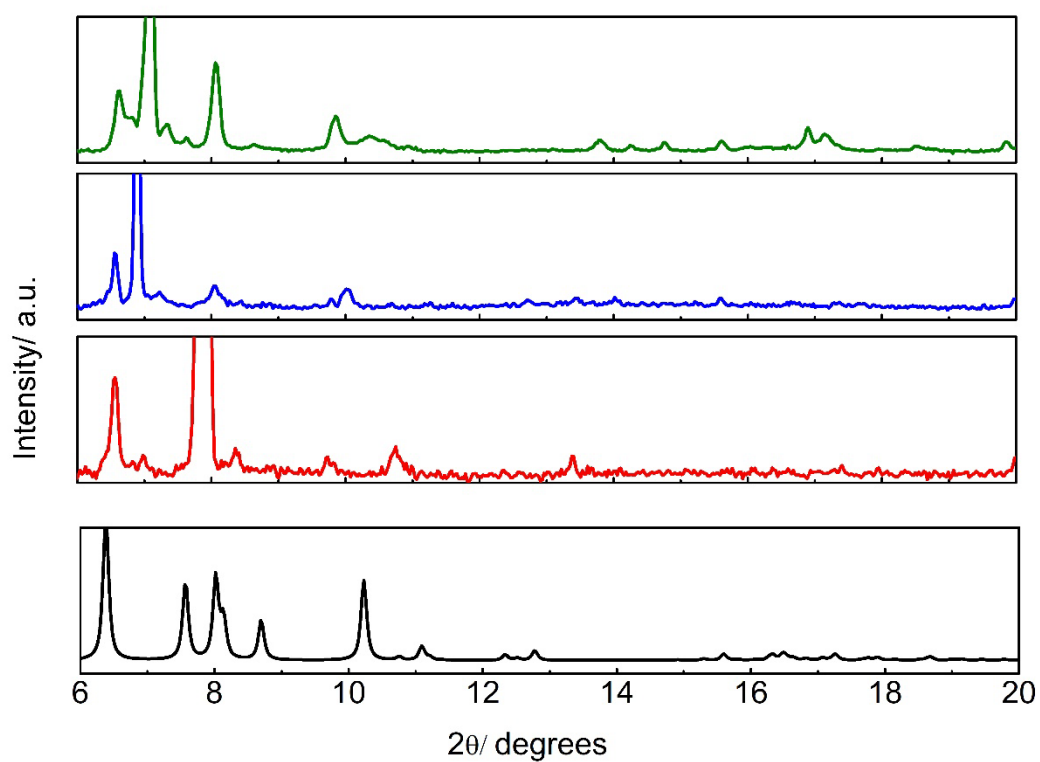

**Figure S18.** Powder X-ray diffractograms at room temperature of complexes **1-Gd** (red), **2-Dy** (blue) and **3-Y** (green) and simulated diffractogram from single crystal X-ray data (black).

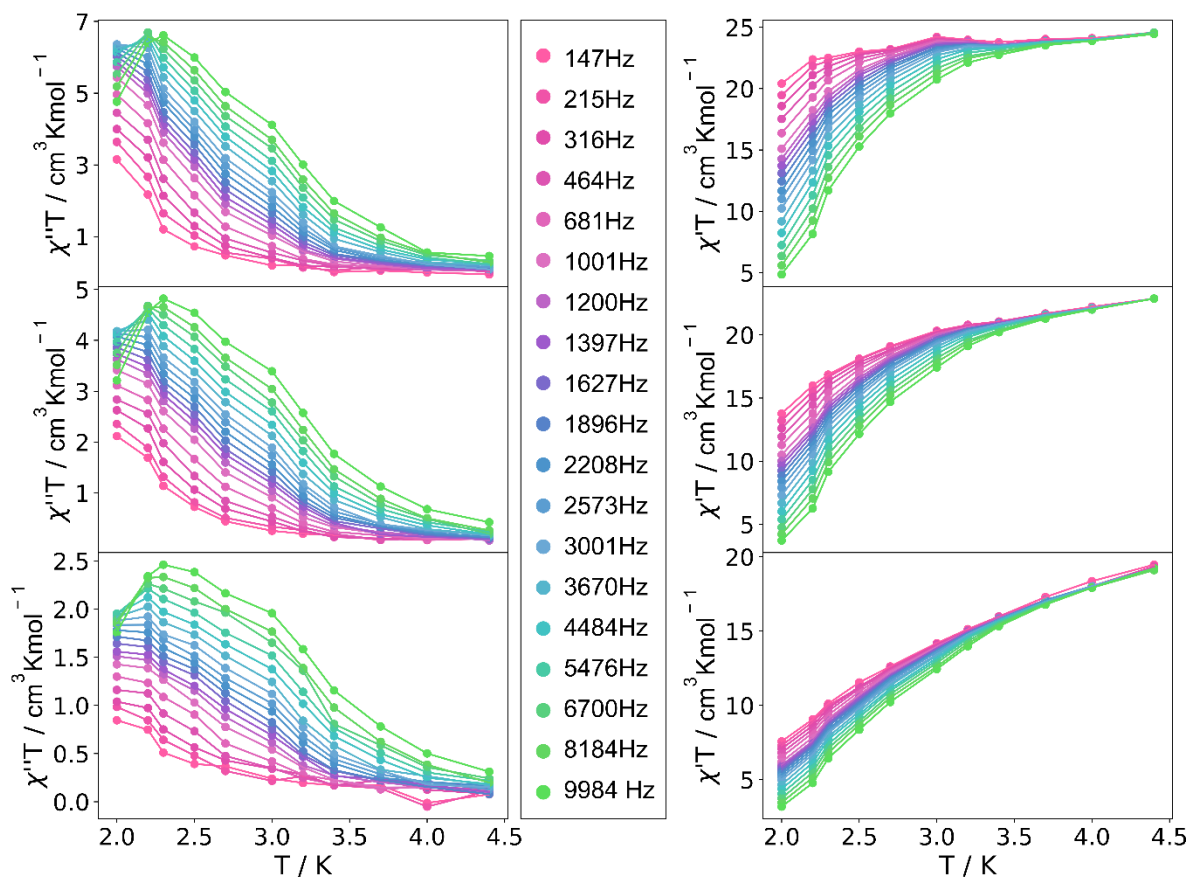

**Figure S19.**  $\chi''T$  vs.  $T$  AC data at 0 DC (bottom), 1500 Oe (middle) and 3000 Oe (top) external DC field of complex **2-Dy**.

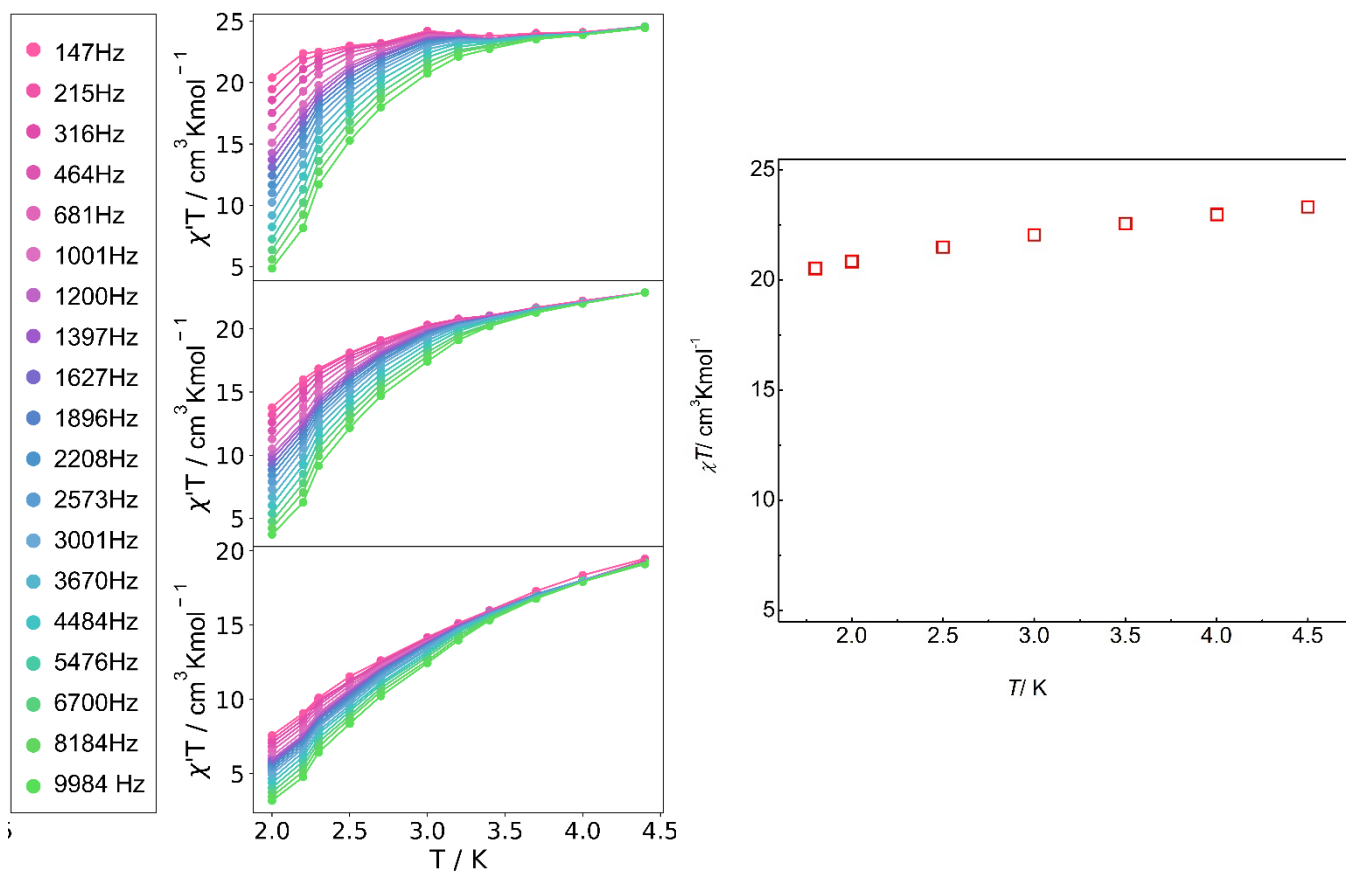

**Figure S20.** Left:  $\chi''T$  vs.  $T$  AC data at 0 DC (bottom), 1500 Oe (middle) and 3000 Oe (top) external DC field of complex **2-Dy**. Right: DC  $\chi'T$  vs.  $T$  data below 4.5 K of complex **2** at 1000 Oe.
